# Supplementary material
Source: PubMed Central journal article supplement (PMC9948597)
Supplement: NIHMS1871271-supplement-SI.pdf [file NIHMS1871271-supplement-SI.pdf]

**Supporting Information:**

**Exploring the Limits of Second- and Third-Order  
Møller-Plesset Perturbation Theory for  
Non-Covalent Interactions: Importance of  
Regularization and Reference Orbitals**

Matthias Loipersberger,<sup>†</sup> Luke W. Bertels,<sup>†,‡</sup> Joonho Lee,<sup>\*,†,¶</sup> and Martin  
Head-Gordon<sup>\*,†,§</sup>

<sup>†</sup>*Department of Chemistry, University of California, Berkeley, California 94720, USA*

<sup>‡</sup>*Present Address: Department of Chemistry, Virginia Tech, Blacksburg, VA 24061, USA*

<sup>¶</sup>*Present Address: Department of Chemistry, Columbia University, NY*

<sup>§</sup>*Chemical Sciences Division, Lawrence Berkeley National Laboratory, Berkeley, California  
94720, USA*

E-mail: jlee7@berkeley.edu; mhg@cchem.berkeley.edu

# 1 Optimal $c_3$ Coefficients

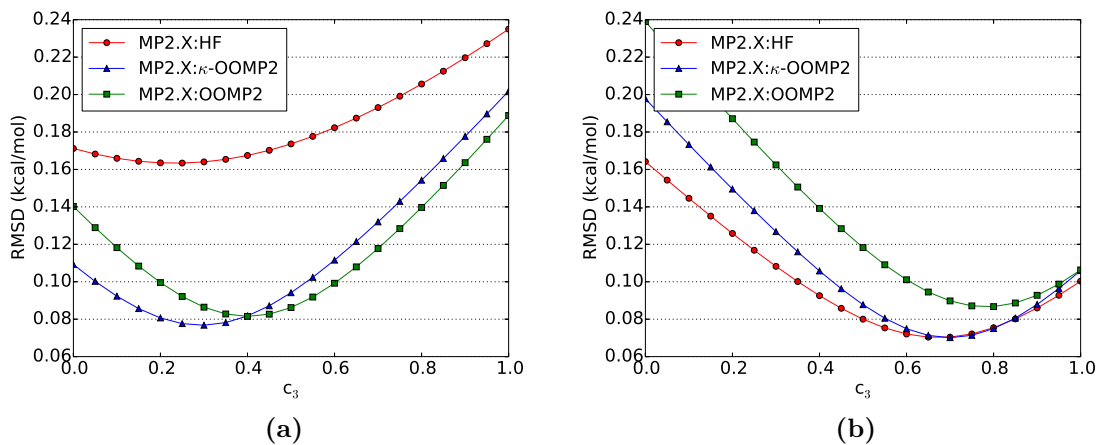

**Figure S1:** Dependence of the the root-mean square deviation on the scaling of the third-order energy ( $c_3$ ) in the A24 data set aTZ with CBS reference (a); aTZ with aTZ reference (b); RMSD in kcal/mol; four scaled MP2.X methods (MP2.X, MP2.X:OOMP2, MP2.X: $\kappa$ -OOMP2).

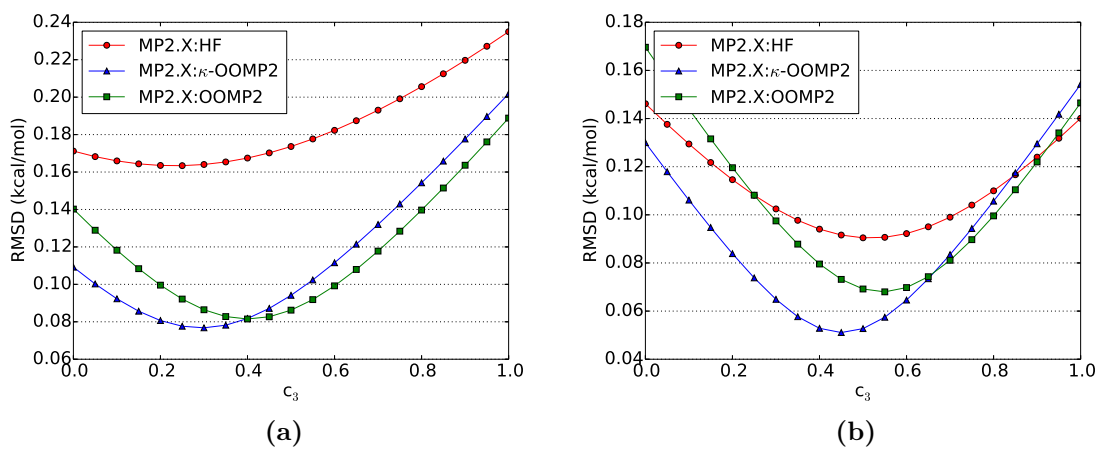

**Figure S2:** Dependence of the the root-mean square deviation on the scaling of the third-order energy ( $c_3$ ) in the A24 data set aTZ with CBS reference (a); aQZ with CBS reference (b); RMSD in kcal/mol; four scaled MP2.X methods (MP2.X, MP2.X:OOMP2, MP2.X: $\kappa$ -OOMP2).

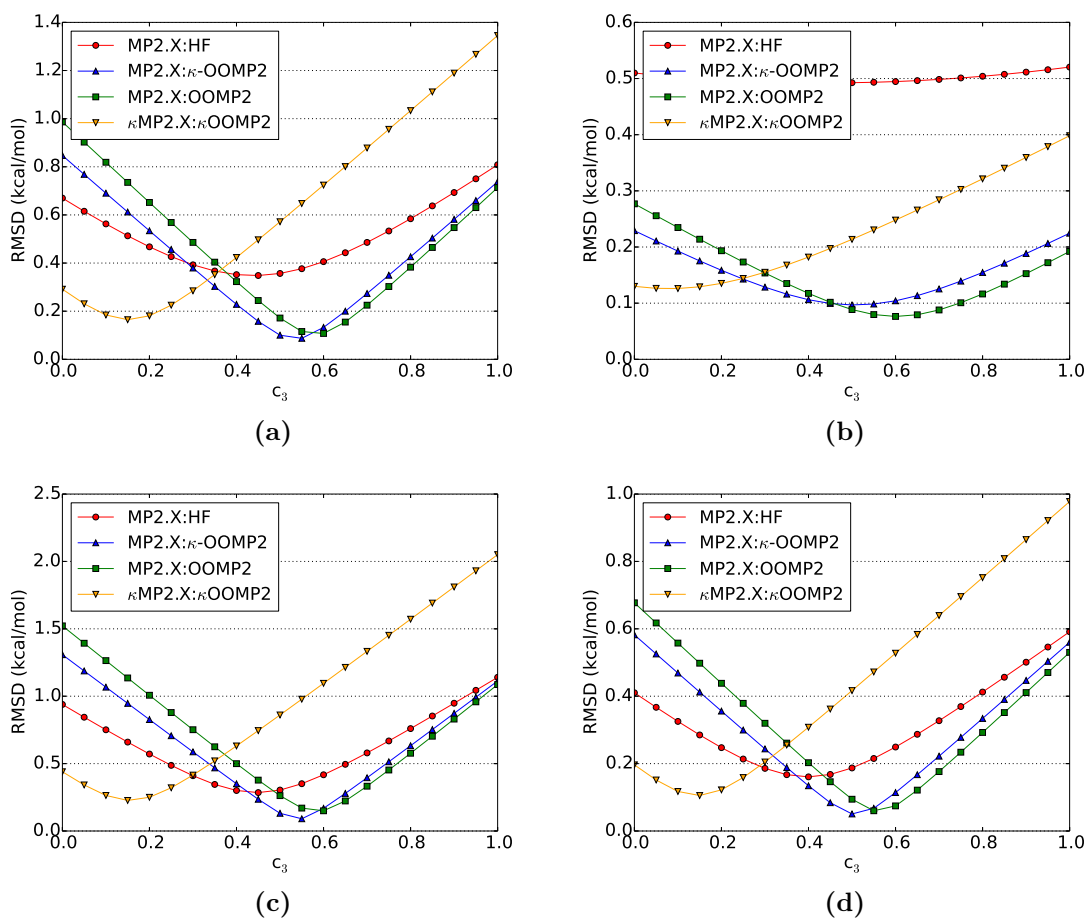

**Figure S3:** Dependence of the the root-mean square deviation on the scaling of the third-order energy ( $c_3$ ) in the S66 data set (a) and the three subgroups hydrogen bonding (b), dispersion (c) and mixed (d); RMSD in kcal/mol; four scaled MP2.X methods (MP2.X, MP2.X:OOMP2, MP2.X: $\kappa$ -OOMP2,  $\kappa$ MP2.X: $\kappa$ OOMP2).

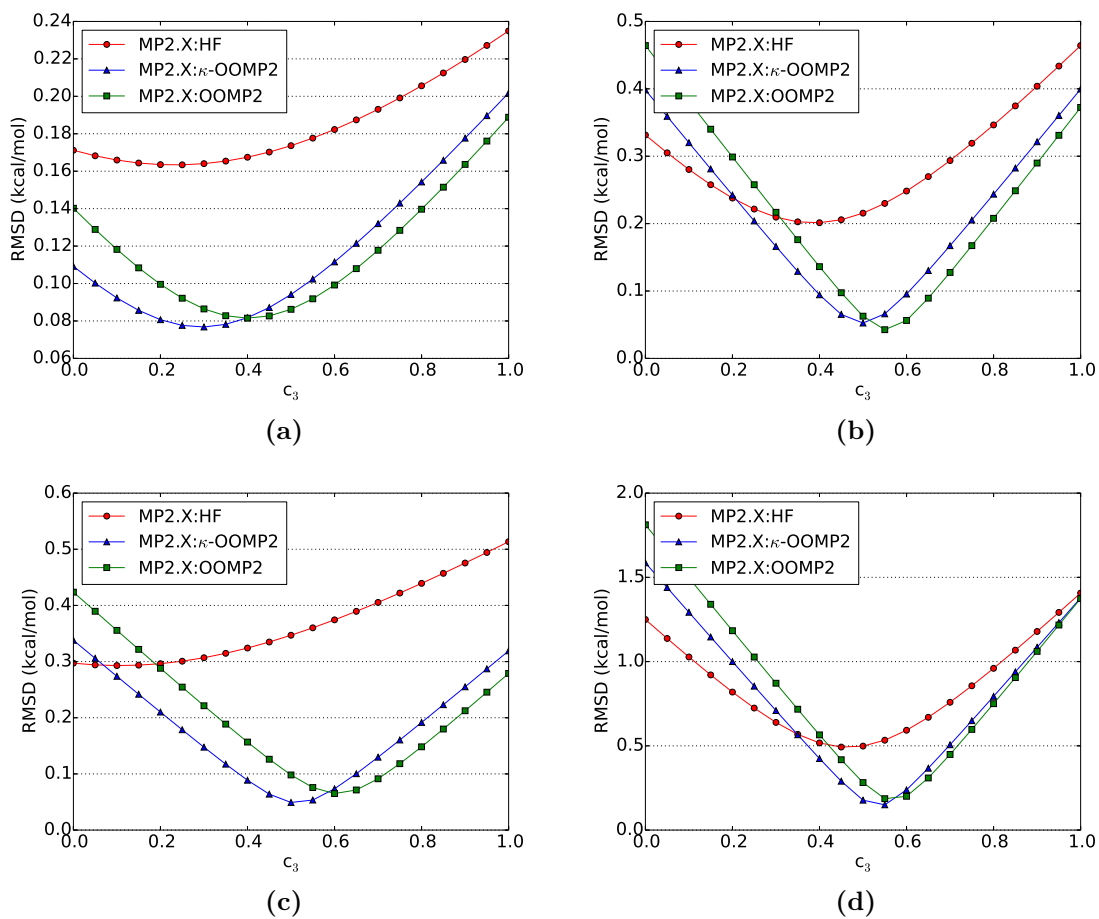

**Figure S4:** Dependence of the the root-mean square deviation on the scaling of the third-order energy ( $c_3$ ) in the A24 (a), DS14 (b), HSG (c) and S22 (d) data sets; RMSD in kcal/mol; four scaled MP2.X methods (MP2.X, MP2.X:OOMP2, MP2.X: $\kappa$ -OOMP2,  $\kappa$ MP2.X: $\kappa$ -OOMP2).

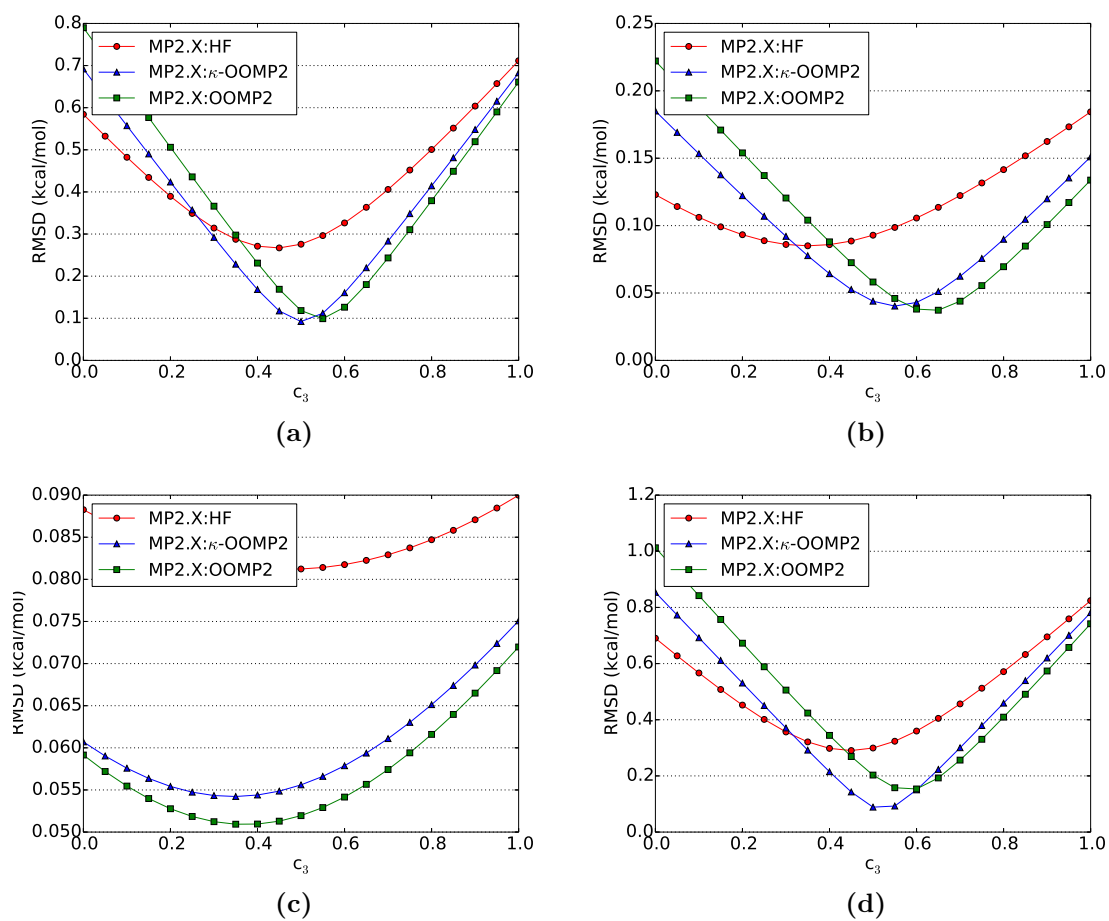

**Figure S5:** Dependence of the the root-mean square deviation on the scaling of the third-order energy ( $c_3$ ) in the X40 (a), HW30 (b), NC15 (c) and AlkBInd12 (d) data sets; RMSD in kcal/mol; four scaled MP2.X methods (MP2.X, MP2.X:OOMP2, MP2.X: $\kappa$ -OOMP2,  $\kappa$ MP2.X: $\kappa$ -OOMP2).

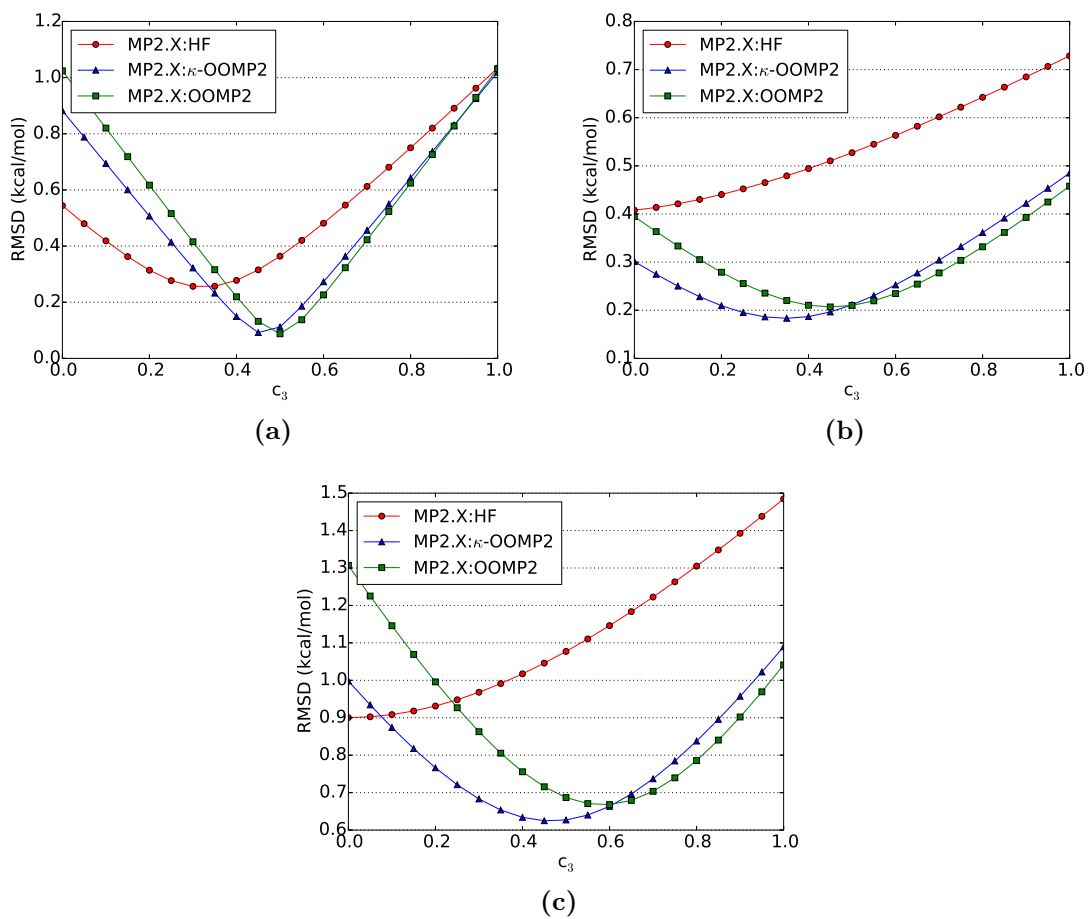

**Figure S6:** Dependence of the the root-mean square deviation on the scaling of the third-order energy ( $c_3$ ) in the CO2Nitrogen16 (a), HB49 (b) and Ionic43 (c) data sets; RMSD in kcal/mol; four scaled MP2.X methods (MP2.X, MP2.X:OOMP2, MP2.X: $\kappa$ -OOMP2,  $\kappa$ MP2.X: $\kappa$ -OOMP2).

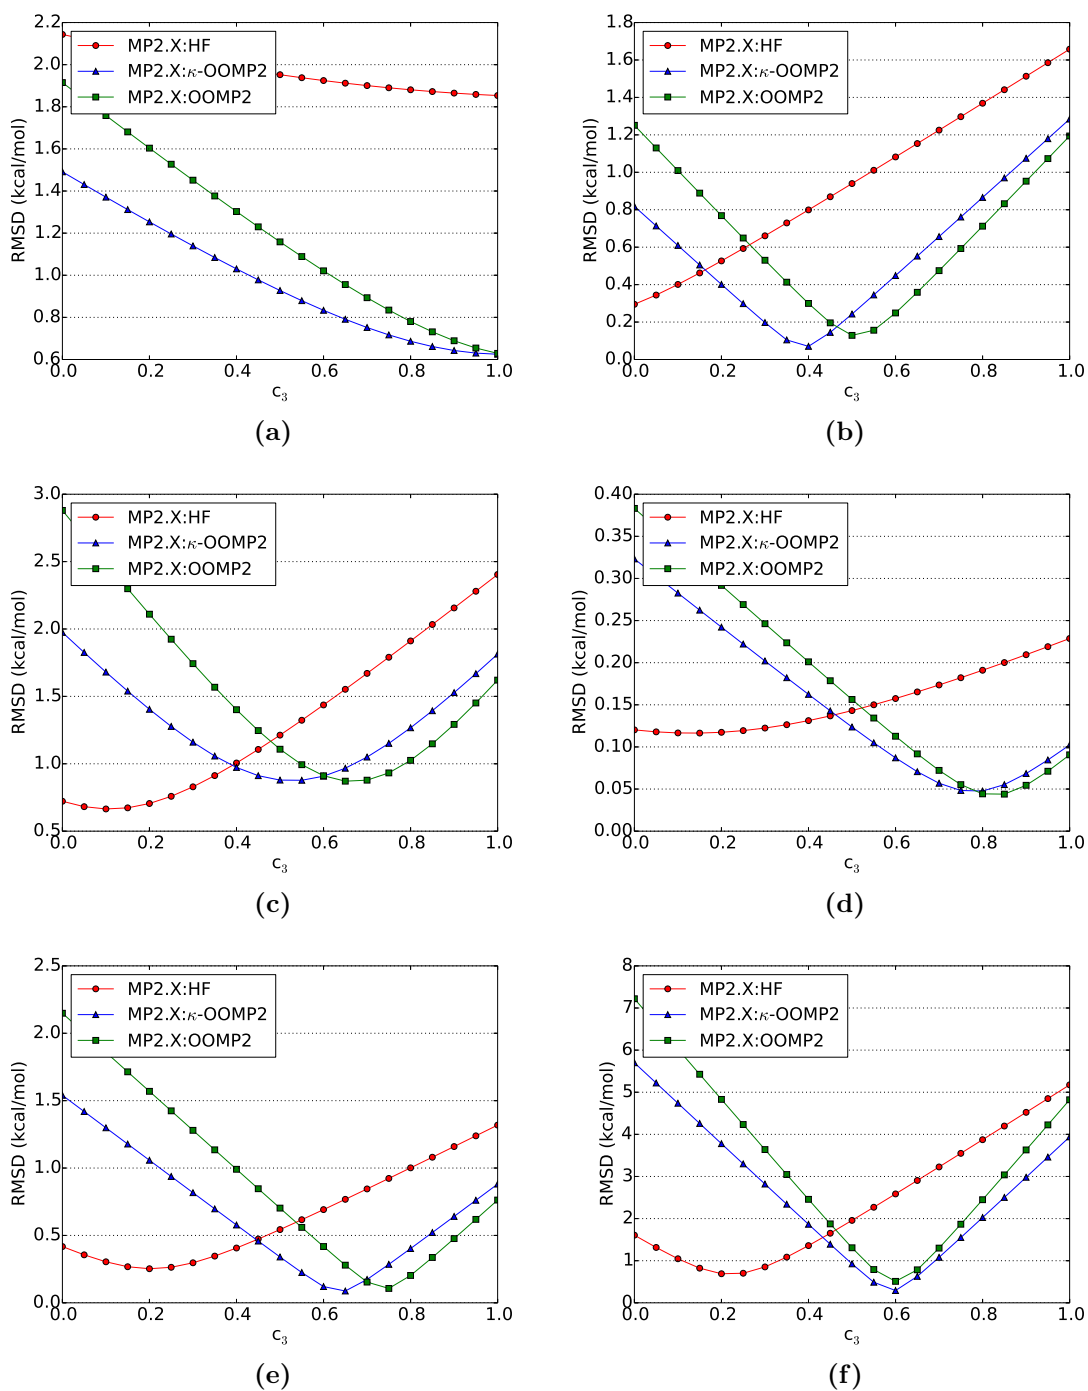

**Figure S7:** Dependence of the the root-mean square deviation on the scaling of the third-order energy ( $c_3$ ) in the TA13 (a), HB49 (b), Bauza30 (c), CT20 (d) data sets, XB51 (e) and Orel26rad (f); RMSD in kcal/mol; four scaled MP2.X methods (MP2.X, MP2.X:OOMP2, MP2.X: $\kappa$ -OOMP2,  $\kappa$ MP2.X: $\kappa$ -OOMP2).



## 2 Box Plots

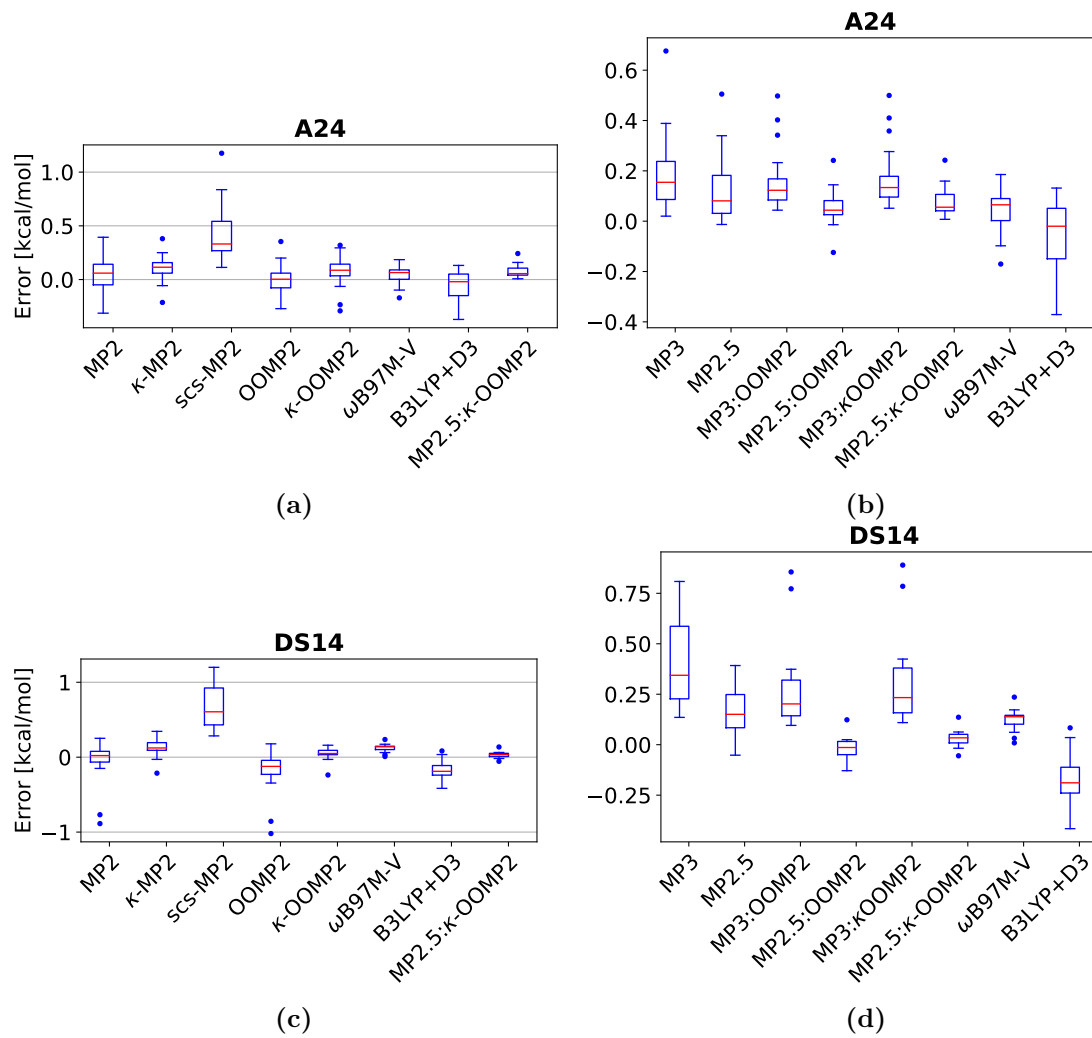

**Figure S8:** Box-plots of the data-sets A24: (a) MP2 methods, (b) MP3 methods; DS14: (c) MP2 methods, (d) MP3 methods. Red lines mark the median deviation, boxes bound the central 50% of the data, whiskers enclose all data points within 1.5 times the inter-quartile range of the box edges, and points denote outlying data.

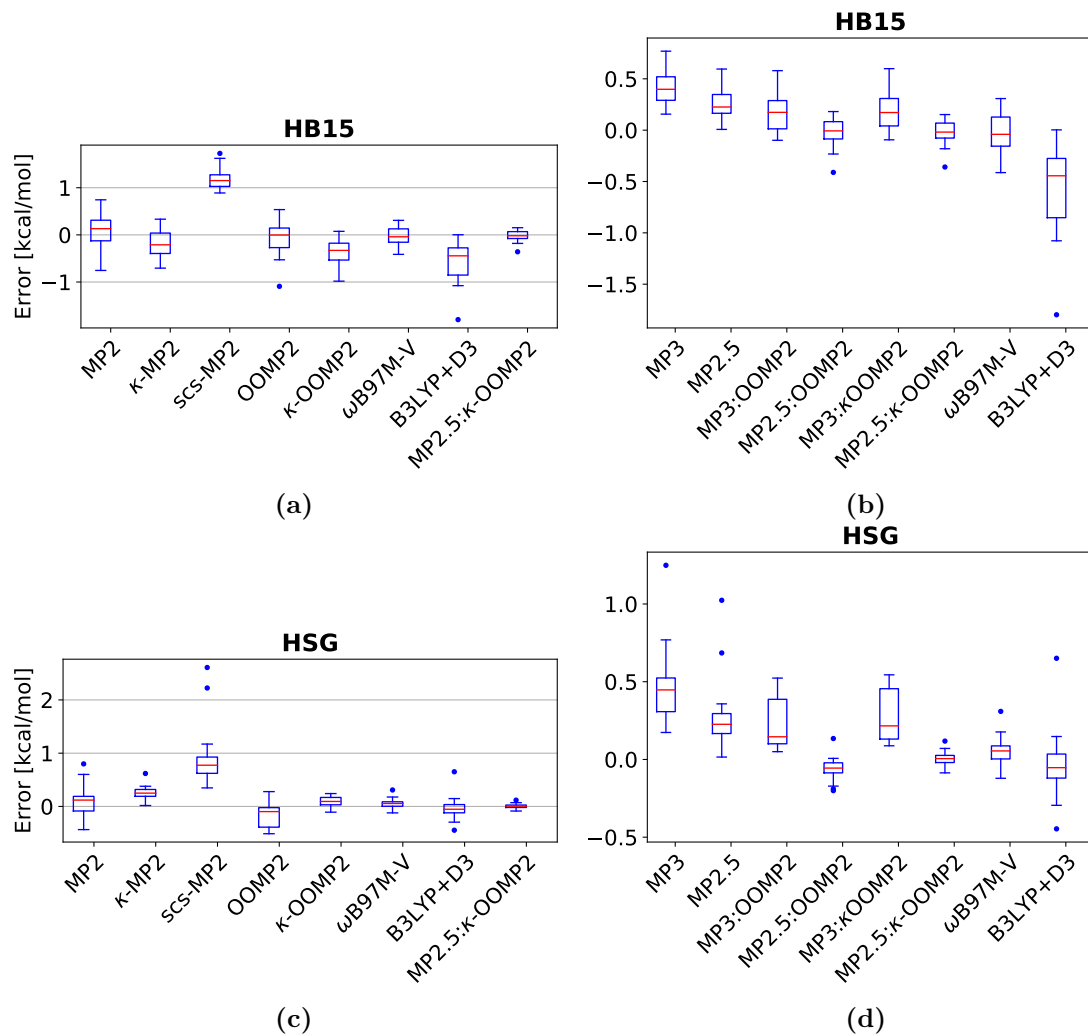

**Figure S9:** Box-plots of the data-sets HB15: (a) MP2 methods, (b) MP3 methods; HSG: (c) MP2 methods, (d) MP3 methods. Red lines mark the median deviation, boxes bound the central 50% of the data, whiskers enclose all data points within 1.5 times the inter-quartile range of the box edges, and points denote outlying data.

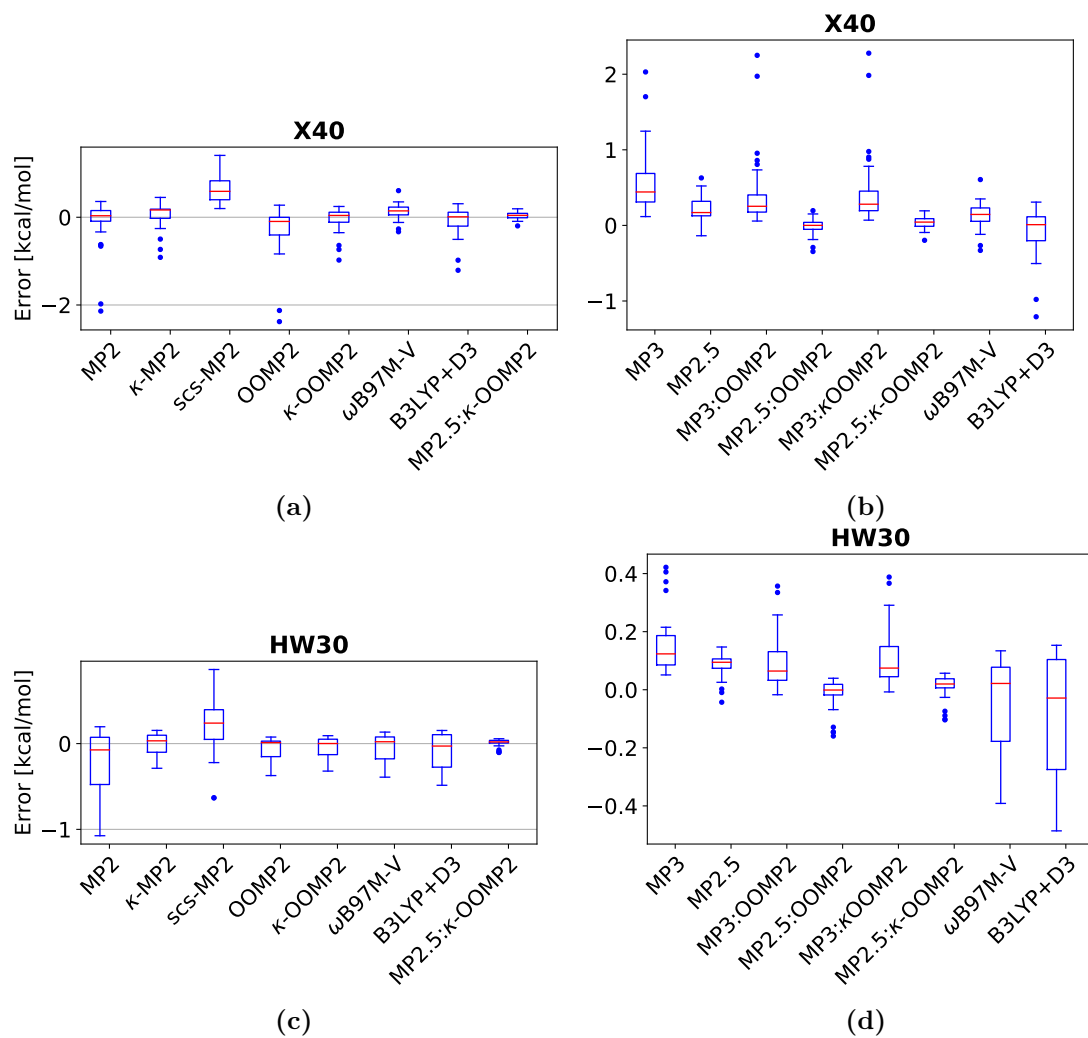

**Figure S10:** Box-plots of the data-sets X40: (a) MP2 methods, (b) MP3 methods; HW30: (c) MP2 methods, (d) MP3 methods. Red lines mark the median deviation, boxes bound the central 50% of the data, whiskers enclose all data points within 1.5 times the inter-quartile range of the box edges, and points denote outlying data.

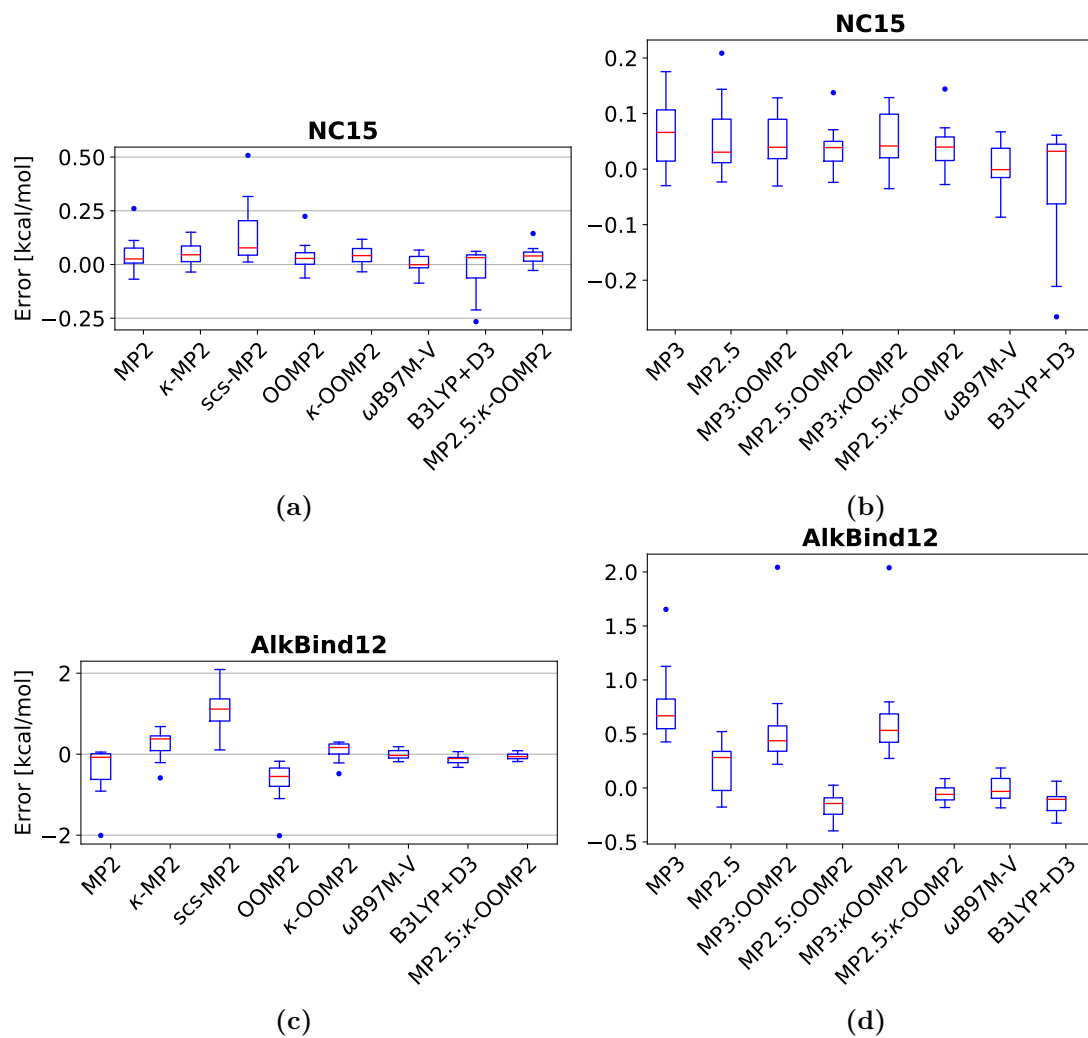

**Figure S11:** Box-plots of the data-sets NC15: (a) MP2 methods, (b) MP3 methods; AlkBInd12: (c) MP2 methods, (d) MP3 methods. Red lines mark the median deviation, boxes bound the central 50% of the data, whiskers enclose all data points within 1.5 times the inter-quartile range of the box edges, and points denote outlying data.

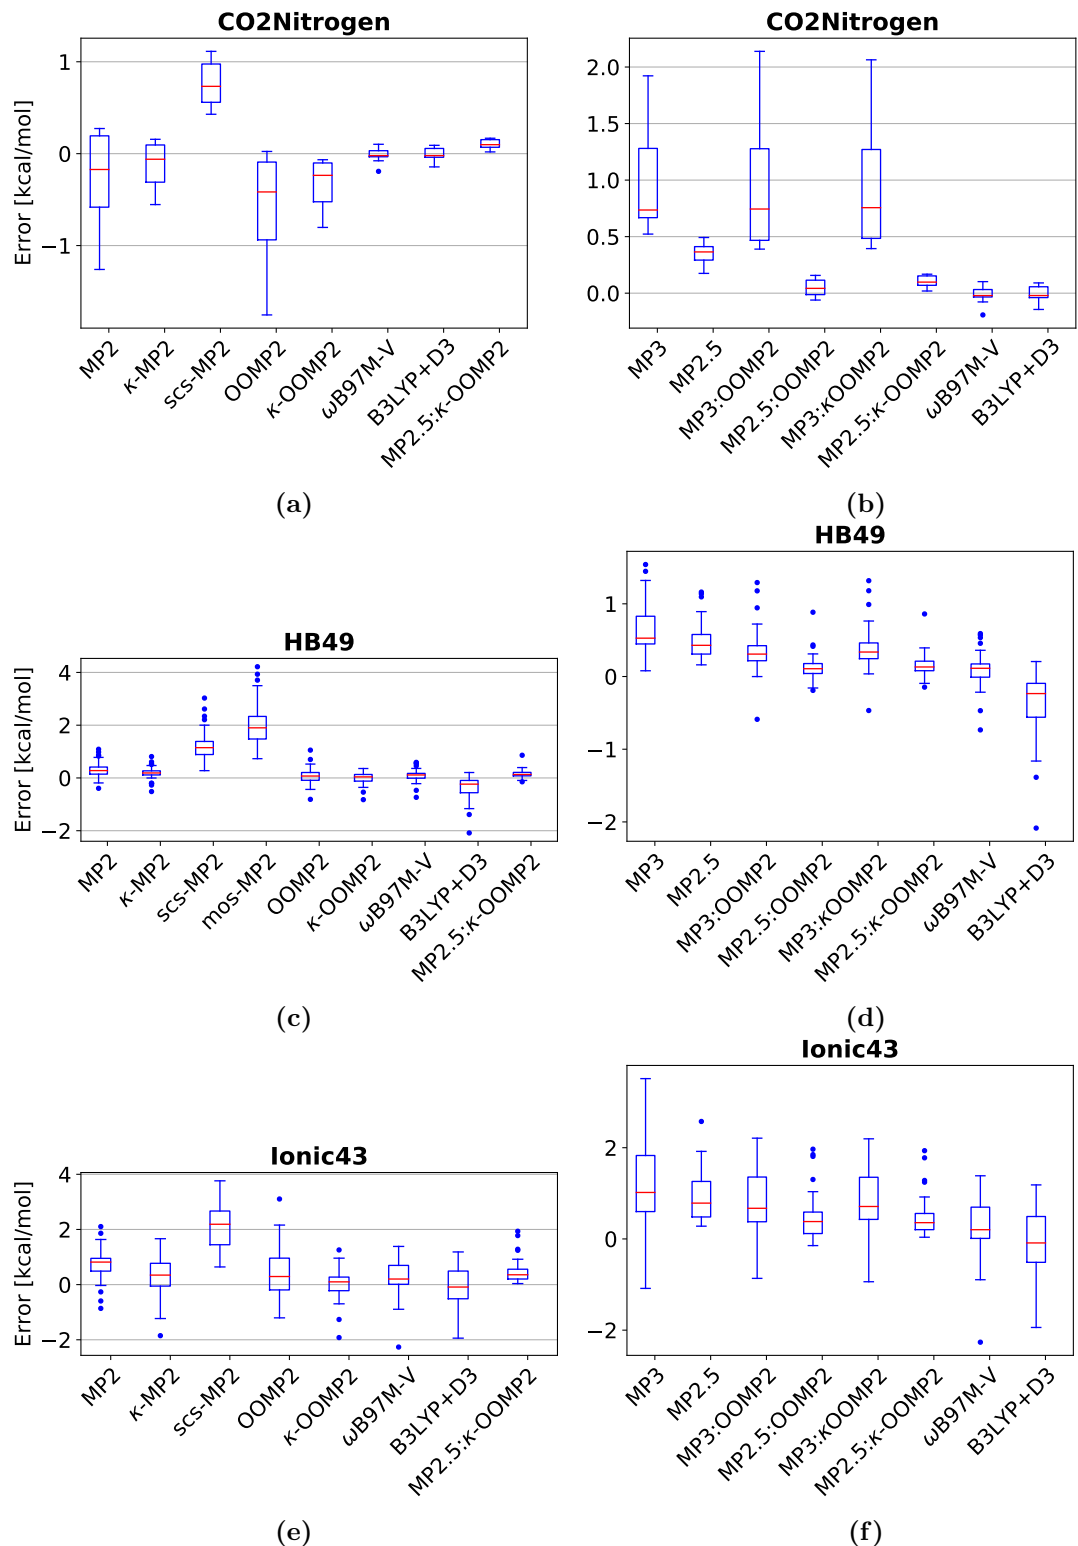

**Figure S12:** Box-plots of the data-sets CO2Nitrogen16: (a) MP2 methods, (b) MP3 methods; HB49: (c) MP2 methods, (d) MP3 methods; Ionic43: (e) MP2 methods, (f) MP3 methods. Red lines mark the median deviation, boxes bound the central 50% of the data, whiskers enclose all data points within 1.5 times the inter-quartile range of the box edges, and points denote outlying data.

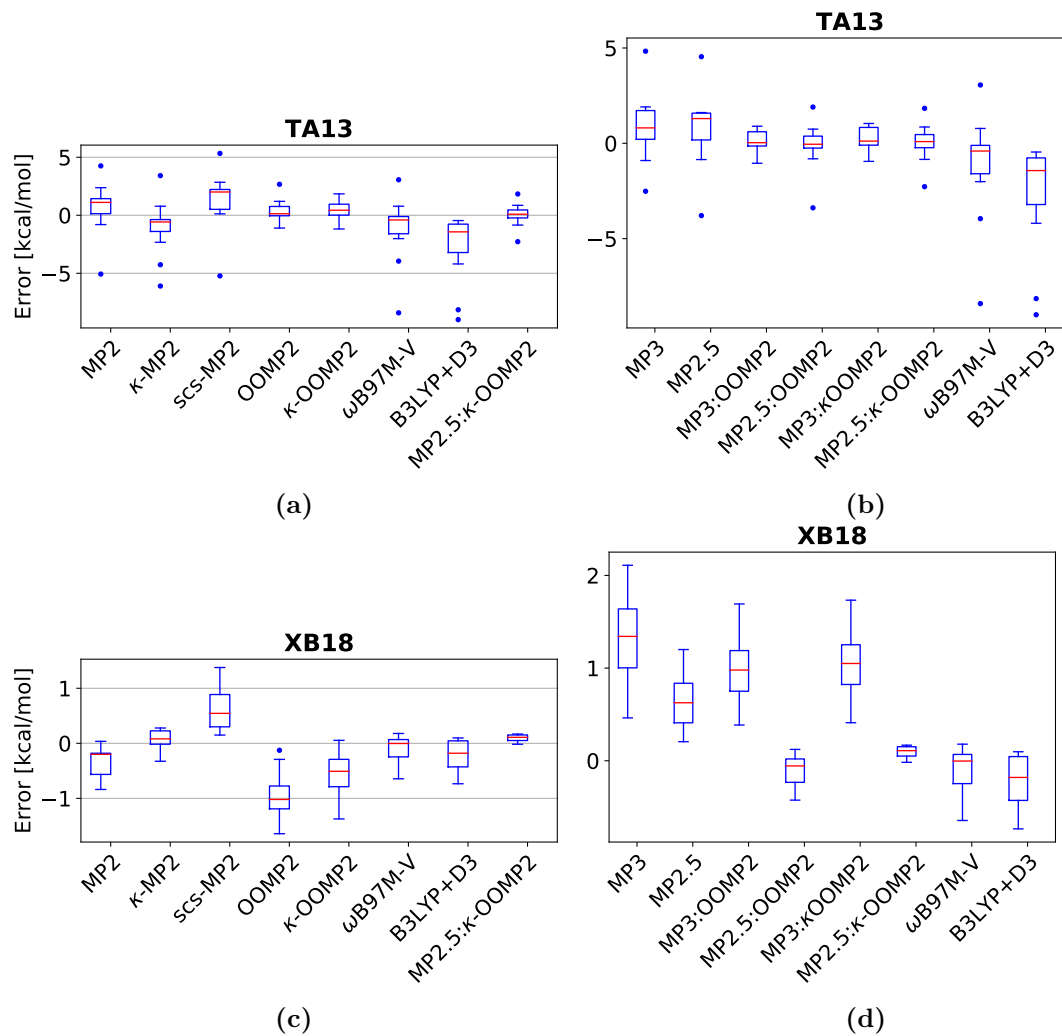

**Figure S13:** Box-plots of the data-sets TA13: (a) MP2 methods, (b) MP3 methods; XB18: (c) MP2 methods, (d) MP3 methods. Red lines mark the median deviation, boxes bound the central 50% of the data, whiskers enclose all data points within 1.5 times the inter-quartile range of the box edges, and points denote outlying data.

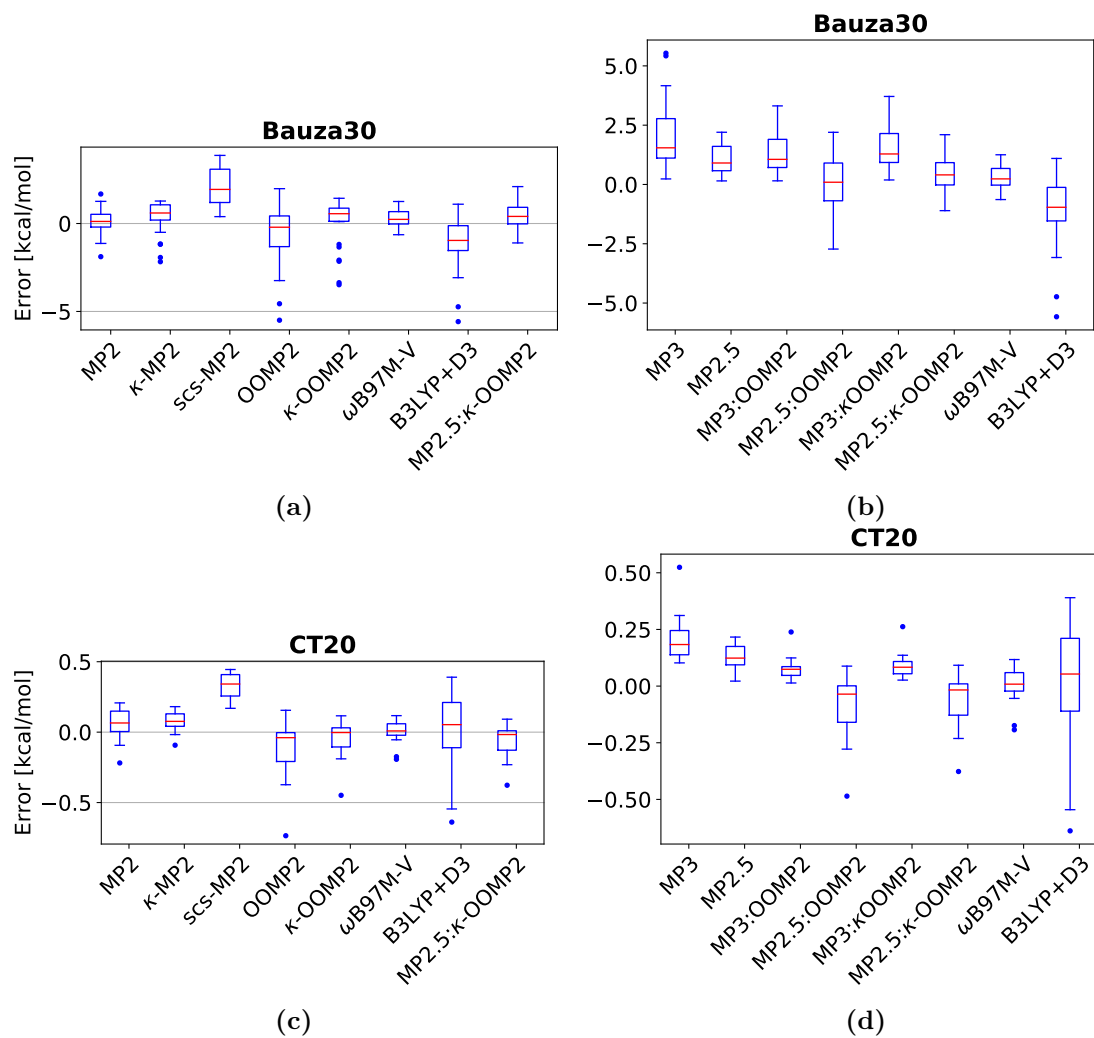

**Figure S14:** Box-plots of the data-sets Bauza30: (a) MP2 methods, (b) MP3 methods; XB18: (c) MP2 methods, (d) MP3 methods. Red lines mark the median deviation, boxes bound the central 50% of the data, whiskers enclose all data points within 1.5 times the inter-quartile range of the box edges, and points denote outlying data.

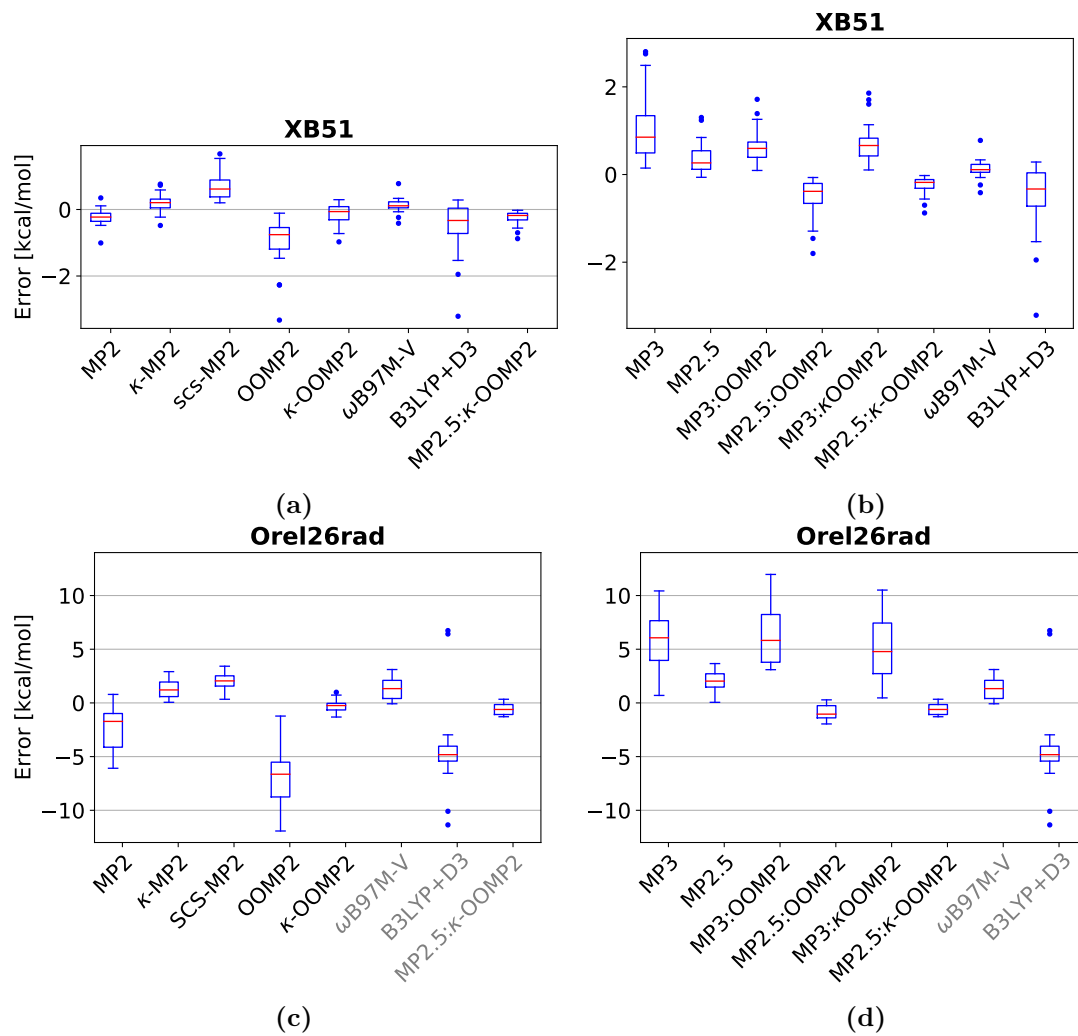

**Figure S15:** Box-plots of the data-sets XB51: (a) MP2 methods, (b) MP3 methods; OreI26rad: (c) MP2 methods, (d) MP3 methods. Red lines mark the median deviation, boxes bound the central 50% of the data, whiskers enclose all data points within 1.5 times the inter-quartile range of the box edges, and points denote outlying data.
